# Supplementary material
Source: PubMed Central journal article supplement (PMC10814373)
Supplement: Enomoto_Development_of_FMPC-_R1_-_Supplemental_File_2.pdf [file Enomoto_Development_of_FMPC-_R1_-_Supplemental_File_2.pdf]

NAME:

DATE:

## FELINE MUSCULOSKELETAL PAIN INDEX

**Please take some time to complete the following questions.**

**Please mark the circle that best describes your cat’s ability to perform the following activities as compared to what you think a normal adult cat, without mobility impairment, would be able to do.**

|                                    |                       |                              |                              |                       |                       |
|------------------------------------|-----------------------|------------------------------|------------------------------|-----------------------|-----------------------|
| <b>1. Walk and/or move easily?</b> |                       |                              |                              |                       |                       |
| <input type="radio"/>              | <input type="radio"/> | <input type="radio"/>        | <input type="radio"/>        | <input type="radio"/> | <input type="radio"/> |
| Normal                             | Not quite normal      | Moderately worse than normal | Barely, or with great effort | Not at all            | Not applicable        |

|                       |                       |                              |                              |                       |                       |
|-----------------------|-----------------------|------------------------------|------------------------------|-----------------------|-----------------------|
| <b>2. Run?</b>        |                       |                              |                              |                       |                       |
| <input type="radio"/> | <input type="radio"/> | <input type="radio"/>        | <input type="radio"/>        | <input type="radio"/> | <input type="radio"/> |
| Normal                | Not quite normal      | Moderately worse than normal | Barely, or with great effort | Not at all            | Not applicable        |

|                                              |                       |                              |                              |                       |                       |
|----------------------------------------------|-----------------------|------------------------------|------------------------------|-----------------------|-----------------------|
| <b>3. Jump up (how well and how easily)?</b> |                       |                              |                              |                       |                       |
| <input type="radio"/>                        | <input type="radio"/> | <input type="radio"/>        | <input type="radio"/>        | <input type="radio"/> | <input type="radio"/> |
| Normal                                       | Not quite normal      | Moderately worse than normal | Barely, or with great effort | Not at all            | Not applicable        |

|                                                         |                       |                              |                              |                       |                       |
|---------------------------------------------------------|-----------------------|------------------------------|------------------------------|-----------------------|-----------------------|
| <b>4. Jump up to kitchen-counter height in one try?</b> |                       |                              |                              |                       |                       |
| <input type="radio"/>                                   | <input type="radio"/> | <input type="radio"/>        | <input type="radio"/>        | <input type="radio"/> | <input type="radio"/> |
| Normal                                                  | Not quite normal      | Moderately worse than normal | Barely, or with great effort | Not at all            | Not applicable        |

**Please rate your cat's ability to:**

| <b>5. Jump down (how well and how easily)?</b> |                       |                              |                              |                       |                       |
|------------------------------------------------|-----------------------|------------------------------|------------------------------|-----------------------|-----------------------|
| <input type="radio"/>                          | <input type="radio"/> | <input type="radio"/>        | <input type="radio"/>        | <input type="radio"/> | <input type="radio"/> |
| Normal                                         | Not quite normal      | Moderately worse than normal | Barely, or with great effort | Not at all            | Not applicable        |

| <b>6. Climb up stairs or steps?</b> |                       |                              |                              |                       |                       |
|-------------------------------------|-----------------------|------------------------------|------------------------------|-----------------------|-----------------------|
| <input type="radio"/>               | <input type="radio"/> | <input type="radio"/>        | <input type="radio"/>        | <input type="radio"/> | <input type="radio"/> |
| Normal                              | Not quite normal      | Moderately worse than normal | Barely, or with great effort | Not at all            | Not applicable        |

| <b>7. Go down stairs or steps?</b> |                       |                              |                              |                       |                       |
|------------------------------------|-----------------------|------------------------------|------------------------------|-----------------------|-----------------------|
| <input type="radio"/>              | <input type="radio"/> | <input type="radio"/>        | <input type="radio"/>        | <input type="radio"/> | <input type="radio"/> |
| Normal                             | Not quite normal      | Moderately worse than normal | Barely, or with great effort | Not at all            | Not applicable        |

| <b>8. Play with toys and/or chase objects?</b> |                       |                              |                              |                       |                       |
|------------------------------------------------|-----------------------|------------------------------|------------------------------|-----------------------|-----------------------|
| <input type="radio"/>                          | <input type="radio"/> | <input type="radio"/>        | <input type="radio"/>        | <input type="radio"/> | <input type="radio"/> |
| Normal                                         | Not quite normal      | Moderately worse than normal | Barely, or with great effort | Not at all            | Not applicable        |

| <b>9. Play and interact with other pets?</b> |                       |                              |                              |                       |                       |
|----------------------------------------------|-----------------------|------------------------------|------------------------------|-----------------------|-----------------------|
| <input type="radio"/>                        | <input type="radio"/> | <input type="radio"/>        | <input type="radio"/>        | <input type="radio"/> | <input type="radio"/> |
| Normal                                       | Not quite normal      | Moderately worse than normal | Barely, or with great effort | Not at all            | Not applicable        |

**Please rate your cat's ability to:**

| <b>10. Get up from a resting position?</b> |                       |                              |                              |                       |                       |
|--------------------------------------------|-----------------------|------------------------------|------------------------------|-----------------------|-----------------------|
| <input type="radio"/>                      | <input type="radio"/> | <input type="radio"/>        | <input type="radio"/>        | <input type="radio"/> | <input type="radio"/> |
| Normal                                     | Not quite normal      | Moderately worse than normal | Barely, or with great effort | Not at all            | Not applicable        |

| <b>11. Lie and/or sit down?</b> |                       |                              |                              |                       |                       |
|---------------------------------|-----------------------|------------------------------|------------------------------|-----------------------|-----------------------|
| <input type="radio"/>           | <input type="radio"/> | <input type="radio"/>        | <input type="radio"/>        | <input type="radio"/> | <input type="radio"/> |
| Normal                          | Not quite normal      | Moderately worse than normal | Barely, or with great effort | Not at all            | Not applicable        |

| <b>12. Stretch?</b>   |                       |                              |                              |                       |                       |
|-----------------------|-----------------------|------------------------------|------------------------------|-----------------------|-----------------------|
| <input type="radio"/> | <input type="radio"/> | <input type="radio"/>        | <input type="radio"/>        | <input type="radio"/> | <input type="radio"/> |
| Normal                | Not quite normal      | Moderately worse than normal | Barely, or with great effort | Not at all            | Not applicable        |

| <b>13. Groom himself or herself?</b> |                       |                              |                              |                       |                       |
|--------------------------------------|-----------------------|------------------------------|------------------------------|-----------------------|-----------------------|
| <input type="radio"/>                | <input type="radio"/> | <input type="radio"/>        | <input type="radio"/>        | <input type="radio"/> | <input type="radio"/> |
| Normal                               | Not quite normal      | Moderately worse than normal | Barely, or with great effort | Not at all            | Not applicable        |

| <b>14. Interact with you and family members?</b> |                       |                              |                              |                       |                       |
|--------------------------------------------------|-----------------------|------------------------------|------------------------------|-----------------------|-----------------------|
| <input type="radio"/>                            | <input type="radio"/> | <input type="radio"/>        | <input type="radio"/>        | <input type="radio"/> | <input type="radio"/> |
| Normal                                           | Not quite normal      | Moderately worse than normal | Barely, or with great effort | Not at all            | Not applicable        |

**Please rate your cat's ability to:**

| <b>15. Tolerate being touched and/or held?</b> |                       |                              |                              |                       |                       |
|------------------------------------------------|-----------------------|------------------------------|------------------------------|-----------------------|-----------------------|
| <input type="radio"/>                          | <input type="radio"/> | <input type="radio"/>        | <input type="radio"/>        | <input type="radio"/> | <input type="radio"/> |
| Normal                                         | Not quite normal      | Moderately worse than normal | Barely, or with great effort | Not at all            | Not applicable        |

| <b>16. Eat?</b>       |                       |                              |                              |                       |                       |
|-----------------------|-----------------------|------------------------------|------------------------------|-----------------------|-----------------------|
| <input type="radio"/> | <input type="radio"/> | <input type="radio"/>        | <input type="radio"/>        | <input type="radio"/> | <input type="radio"/> |
| Normal                | Not quite normal      | Moderately worse than normal | Barely, or with great effort | Not at all            | Not applicable        |

| <b>17. Use the litter box (get in and out, squat, cover waste?)</b> |                       |                              |                              |                       |                       |
|---------------------------------------------------------------------|-----------------------|------------------------------|------------------------------|-----------------------|-----------------------|
| <input type="radio"/>                                               | <input type="radio"/> | <input type="radio"/>        | <input type="radio"/>        | <input type="radio"/> | <input type="radio"/> |
| Normal                                                              | Not quite normal      | Moderately worse than normal | Barely, or with great effort | Not at all            | Not applicable        |
